# Supplementary material for: Source Attribution Study of Sporadic Salmonella Derby Cases in France
Source: PubMed Central journal article supplement (PMC7240076; doi:10.3389/fmicb.2020.00889), 2020-05-14
Supplement: Image_2.pdf [file Image_2.pdf]

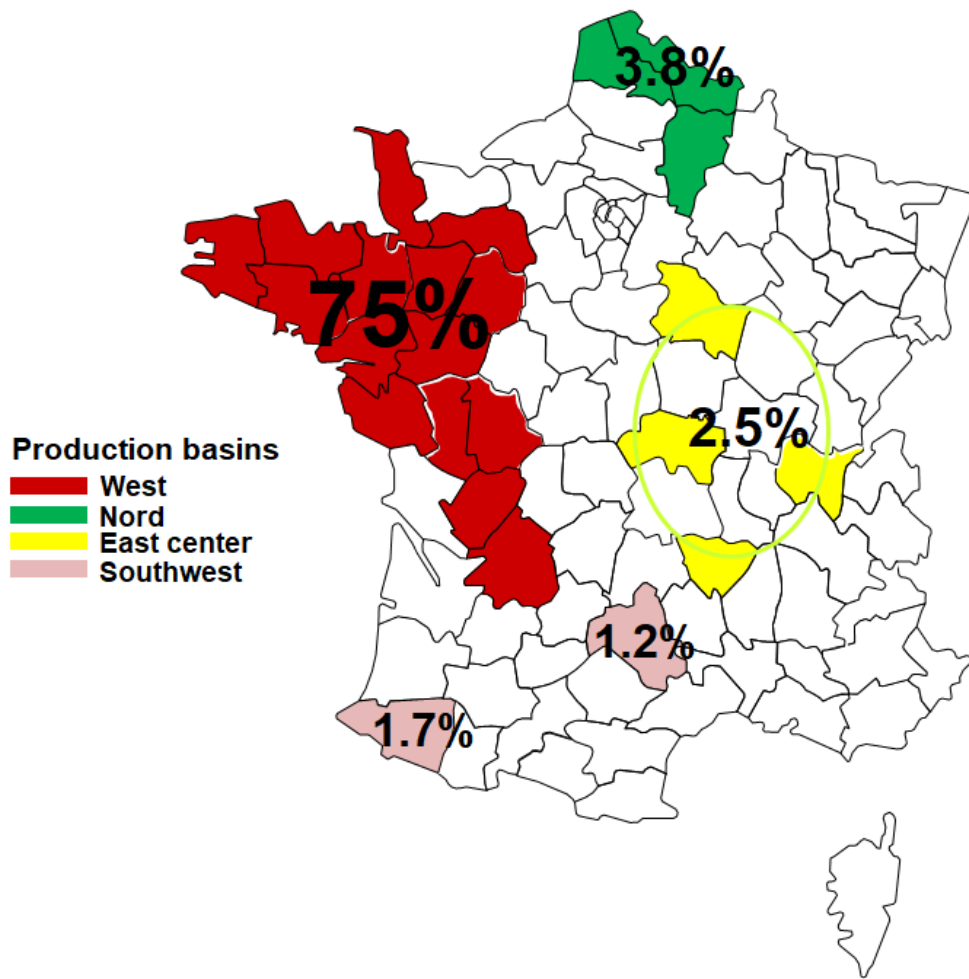

Supplementary figure 2. Production basins of pork sector in France
